# Supplementary material for: Stimulus-responsive conformational transformation of peptide with cell penetrating motif for triggered cytotoxicity
Source: Royal Society of Chemistry journal article supplement (doi:10.1039/d0nj04608f), 2020-01-01
Supplement: d0nj04608f1.pdf [file d0nj04608f1.pdf]

**Electronic Supplementary Information**

**Stimulus-Responsive Conformational  
Transformation of Peptide with Cell  
Penetrating Motif for Triggered Cytotoxicity**

*Jeonghun Lee,<sup>a</sup> Eun-Taex Oh,<sup>b</sup> Ye-eun Joo,<sup>a</sup> Ha Gyeong Kim,<sup>c</sup> Heon Joo Park,<sup>\*,c</sup>  
and Chulhee Kim<sup>\*,a</sup>*

<sup>a</sup>Department of Polymer Science and Engineering, Inha University, Incheon 22212, Korea

<sup>b</sup>Department of Biomedical Sciences, School of Medicine, Inha University, Incheon 22212,  
Korea

<sup>c</sup>Department of Microbiology, Hypoxia-related Disease Research Center, College of  
Medicine, Inha University, Incheon 22212, Korea

**\*Corresponding Author:** [chk@inha.ac.kr](mailto:chk@inha.ac.kr), [park001@inha.ac.kr](mailto:park001@inha.ac.kr)



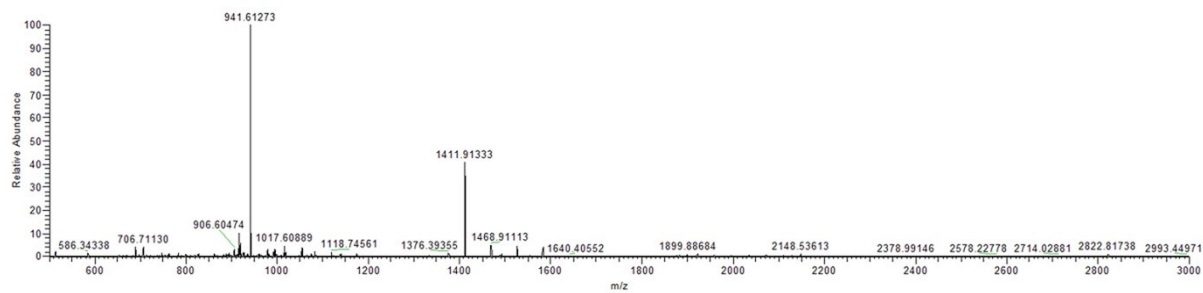

**Fig. S3.** LC-Mass spectrum of KLA-Acm-R.

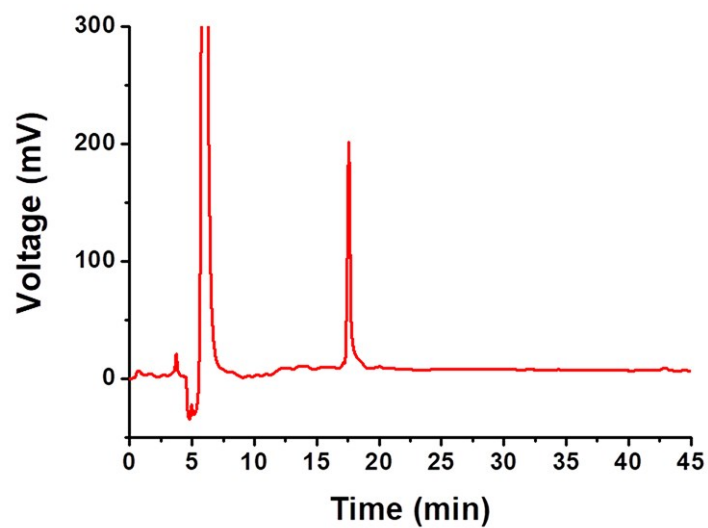

**Fig. S4.** HPLC chromatogram of KLA-SS-R.

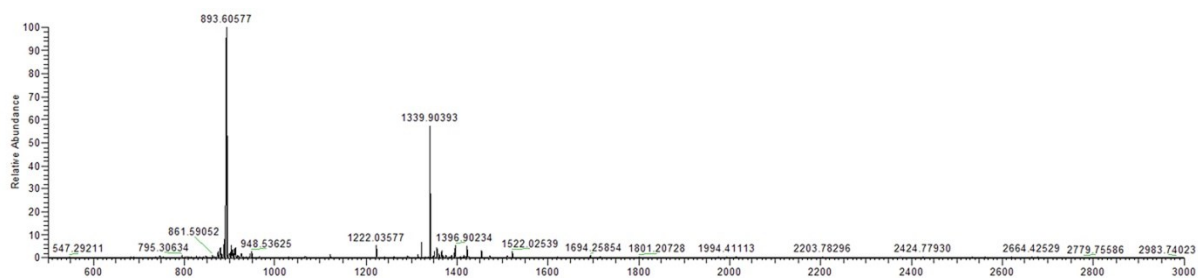

**Fig. S5.** LC-Mass spectrum of KLA-SS-R.

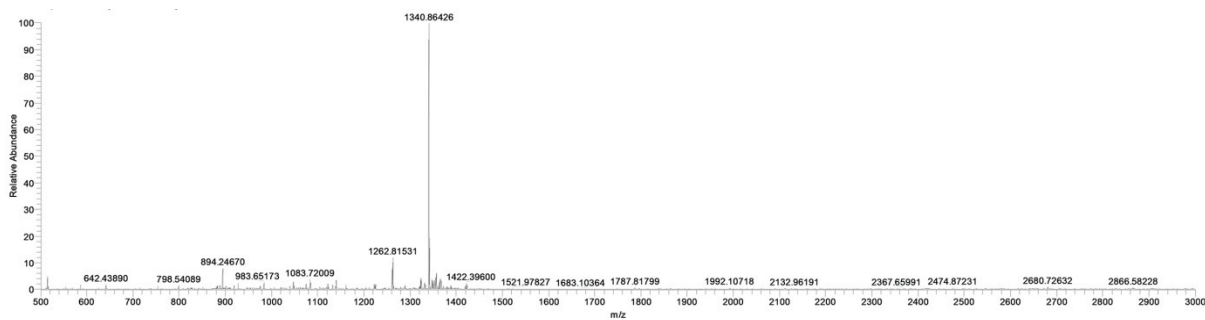

**Fig. S6.** LC-Mass spectrum of KLA-SS-R after TCEP treatment (10 equiv).  $m/z$  calculated for  $[M+2H]^{2+}$  1340.87, found 1340.86.

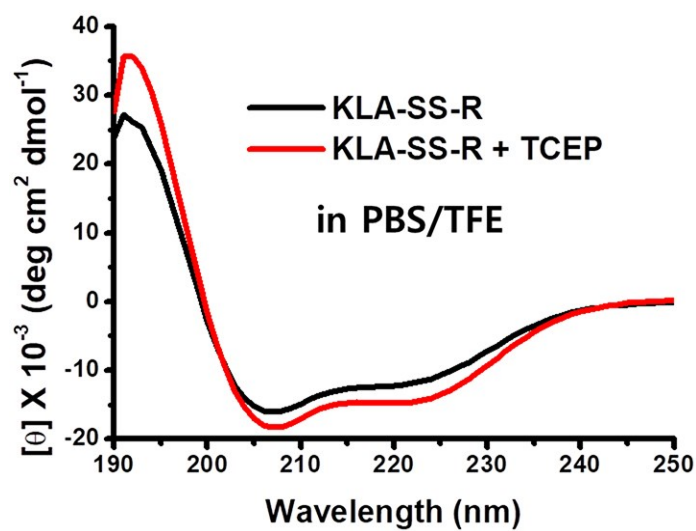

**Fig. S7.** CD spectra of KLA-SS-R without and with TCEP in PBS/TFE mixed solvent in the wavelength range from 190 to 250 nm.

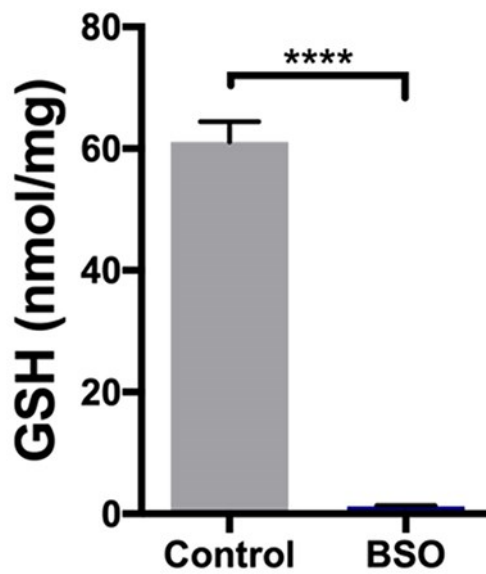

**Fig. S8.** Depletion of GSH in MDA-MB-231 cells. Columns represent compiled data (means  $\pm$  standard deviation) derived from three independent experiments. \*\*\*\*:  $P < 0.0001$ .

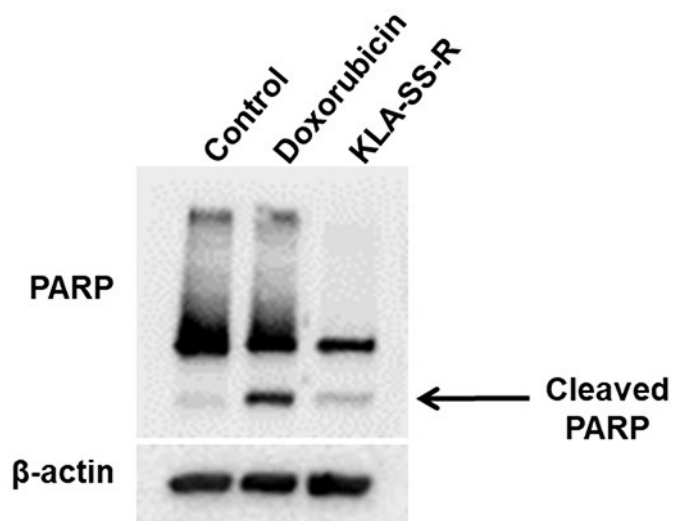

**Fig. S9.** Effect of KLA-SS-R on PARP cleavage in MDA-MB-231 cells. Cells were treated with 3  $\mu$ M doxorubicin or 30  $\mu$ M KLA-SS-R, and PARP cleavage was determined by immunoblot analysis.
